# Supplementary material
Source: publisher figshare collection journal article supplement (https://gsapubs.figshare.com/articles/dataset/_/21714257)
Supplement: Supplementary file 1 [file 1]

## Sheet: SI-1
Sample	Volcanic_center	Map_symbol	Unit	Geochemical_grouping	Accumulation of major or accessory phases	Source	Latitude_North (°)	Longitude_West (°)	143Nd/144Nd	ENd	87Sr/86Sr	206Pb/204Pb	207Pb/204Pb	208Pb/204Pb	LOI_pct	SiO2_pct	TiO2_pct	Al2O3_pct	FeO_pct	MnO_pct	MgO_pct	CaO_pct	Na2O_pct	K2O_pct	P2O5_pct	Sc_ppm	V_ppm	Cr_ppm	Co_ppm	Ni_ppm	Rb_ppm	Sr_ppm	Y_ppm	Zr_ppm	Nb_ppm	Cs_ppm	Ba_ppm	La_ppm	Ce_ppm	Pr_ppm	Nd_ppm	Sm_ppm	Eu_ppm	Gd_ppm	Tb_ppm	Dy_ppm	Ho_ppm	Er_ppm	Tm_ppm
4	NFBB	Kda	ignimbrite	ignimbrite		Medynski	30.1807	-115.549								68.6755	0.82668	12.8934	6.38343	0.140798	1.96089	1.82273	1.60796	5.51971	0.168882	20.7973	68.5544	0.001	5.75822	4.45384	130.017	254.655	52.6152	143.641	3.53262	0.787147	587.498	11.4491	27.2399	4.15319	20.7971	6.67505	1.97315	8.38857	1.51001	9.93892	2.08825	5.8247	0.861763
14	NFBB	Kl-m	volcanic rock	lavas etc		Medynski	30.1739	-115.559								55.4275	1.46483	14.8105	11.999	0.211243	3.96874	8.10436	3.35215	0.487217	0.174313
15	NFBB	Kh-m	hypabyssal intrusion	hypabyssal intrusion		Medynski	30.171	-115.558								54.7347	1.33641	15.5524	10.9965	0.229846	5.36655	5.67941	5.51538	0.430875	0.157855	37.1771	456.01	109.861	101.452	48.6359	25.0126	261.13	32.3984	79.3493	2.07107	2.16508	210.385	6.43892	15.8523	2.46619	12.131	3.85265	1.28544	5.04852	0.936773	6.09447	1.31513	3.7178	0.530713
18	NFBB	Khc-m	volcanic rock	lavas etc		Medynski	30.1676	-115.563								53.872	1.21368	17.3436	9.80331	0.230192	3.8683	9.72465	3.35596	0.432469	0.155874	41.7039	497.531	52.8534	163.403	27.9345	8.31232	211.266	29.8609	69.7433	1.77614	0.0607512	163.335	5.17082	13.198	2.04818	10.5261	3.48046	1.11954	4.65378	0.857676	5.76663	1.21573	3.39098	0.49646
19	NFBB	Kl-m	volcanic rock	lavas etc		Medynski	30.1676	-115.564								54.1813	1.36203	15.1671	11.6941	0.224571	4.7404	8.77017	3.36922	0.3307	0.160364	39.9411	350.168	27.186		21.079	16.3654	205.515	34.553	83.5693	2.22055	0.662338	129.002	6.28934	15.8013	2.4837	12.3945	4.08704	1.33109	5.28145	0.975717	6.31494	1.37314	3.83507	0.553455
20	NFBB	Kh-m	hypabyssal intrusion	hypabyssal intrusion		Medynski	30.1672	-115.568								54.9295	1.36102	15.2066	11.1953	0.203401	4.38865	8.38409	3.67916	0.485364	0.166951	34.5904	444.044	61.734	105.378	38.0358	17.8076	228.961	29.5189	69.1354	1.8043	2.44057	101.623	5.31056	13.2792	2.06608	10.562	3.42688	1.18262	4.53751	0.824238	5.52695	1.19211	3.22329	0.477754
22	SVBB	Kpsf-ma	plutonic rock	plutonic rock		Morris et al., 2019	29.9713	-115.245	0.51284	6.70215	0.703511	18.4879	15.5613	38.192	0.21	52.8177	0.999344	17.5135	10.0918	0.213429	5.65354	9.13895	2.78542	0.695509	0.0907483	32.1311	277.596	42.669		38.412	14.652	212.194	22.2187	104.346	2.09105	0.319098	208.628	5.14743	12.5391	1.87533	8.98836	2.769	0.974084	3.40174	0.626934	4.0413	0.864962	2.41904	0.364447
23	SVBB	Kpsf-i	plutonic rock	plutonic rock		Morris et al., 2019	29.9691	-115.247							0.53	61.1035	1.18612	15.8734	5.62202	0.116297	2.97474	8.18718	4.33361	0.382353	0.220726	27.7172	193.446	22.77		6.237	6.93	228.842	43.98	158.4	3.90402	0.217161	175.604	6.15229	15.4372	2.46488	12.4998	4.49529	1.19739	6.07681	1.14348	7.74828	1.67985	4.68794	0.697056
24	SVBB	Kh-i	hypabyssal intrusion	hypabyssal intrusion		Morris et al., 2019	29.8878	-115.372							1.53	62.7667	1.41955	13.8291	9.21758	0.173906	2.32002	4.90637	3.91876	1.173	0.274974	29.977	175.725	0.001		3.762	31.086	228.353	54.2598	192.357	4.07526	0.308858	299.96	11.1129	28.067	4.33794	20.9616	6.79548	1.72874	8.30483	1.52309	9.92897	2.12825	5.93752	0.870015
25	SVBB	Kh-i	hypabyssal intrusion	hypabyssal intrusion		Morris et al., 2019	29.886	-115.367	0.512796	5.84486	0.704769	19.1219	15.6263	38.6787	1.48	62.2374	1.23167	13.9404	8.92003	0.172123	2.45175	5.27021	3.673	1.91507	0.18834	28.0756	218.394	4.257		5.643	41.283	210.364	45.4035	191.268	3.69012	0.230443	517.832	9.3658	23.4741	3.56623	17.0077	5.46202	1.22396	6.63901	1.23714	8.24816	1.77629	5.07086	0.729374
29	SVBB	Kh-i	hypabyssal intrusion	hypabyssal intrusion		Morris et al., 2019	29.8712	-115.371	0.512823	6.37715	0.703915	18.4623	15.5585	38.1653	1.35	59.8692	0.875803	16.7392	7.73964	0.190991	3.32498	7.10766	3.43644	0.5664	0.149659	26.7385	176.616	20.691		14.355	8.811	225.118	31.191	99.792	1.94084	0.278242	228.403	6.51824	16.3858	2.53473	12.1129	3.9466	1.2162	4.87481	0.887158	5.83193	1.23997	3.36959	0.503356
30	SVBB	Kbat-i	volcanic rock	lavas, lava domes, and B&AFTs		Morris et al., 2019	29.8695	-115.372							4.43	59.1866	1.0159	16.5241	8.21501	0.216442	2.12621	9.10281	3.05917	0.421258	0.132536	30.8913	229.086	16.632		11.088	7.227	198.176	32.6711	95.832	1.99235	0.823494	166.344	6.00685	15.0881	2.3596	11.6819	3.87109	1.17253	4.89636	0.922992	6.0205	1.27631	3.60767	0.53914
31	SVBB	no label - dike	hypabyssal intrusion	hypabyssal intrusion		Morris et al., 2019	29.8694	-115.372							3.65	66.1915	0.833264	14.733	7.62199	0.26728	2.62507	3.28944	3.26288	0.996841	0.178712	22.798	105.039	6.633		5.049	15.444	168.124	36.4309	112.365	2.56383	0.523752	283.742	5.64253	15.6204	2.59573	13.3075	4.46919	1.29987	5.56415	1.06644	7.07758	1.48847	4.12084	0.629505
32	SVBB	Ki-SF	ignimbrite	ignimbrite		Morris et al., 2019	29.867	-115.371							4.62	69.3437	0.671647	13.3399	5.339	0.169799	0.932507	4.56563	4.55059	0.939888	0.147337	20.8941	34.848	4.257		2.574	14.85	123.839	37.849	100.881	2.22881	0.381971	257.827	7.27502	17.9001	2.87044	14.6538	4.68867	1.45786	5.92123	1.0999	7.00505	1.48263	4.20354	0.616639
34	SVBB	Kl-s	volcanic rock	lavas, lava domes, and B&AFTs		Morris et al., 2019	29.8633	-115.37	0.512849	6.88823	0.70487	18.4879	15.5603	38.1873	1.25	68.7728	0.742886	14.1424	5.40172	0.164678	1.43366	3.73495	4.5505	0.877856	0.178541	22.1645	46.233	4.851		3.762	15.048	215.192	42.7729	115.137	2.61971	0.428056	325.241	7.94524	19.3282	3.00652	15.4728	5.18477	1.53871	6.49263	1.21493	7.83491	1.66788	4.59511	0.695771
36	SVBB	Ku	undifferentiated	undifferentiated		Morris et al., 2019	29.8803	-115.374							1.35	51.4667	0.948421	20.2061	9.43373	0.117663	3.24066	10.665	3.48716	0.323667	0.110862	33.0838	299.475	13.365		9.504	3.069	239.923	23.7546	70.389	1.33715	0.22312	223.68	3.96273	10.1845	1.60591	8.50572	2.79411	1.0505	3.67499	0.68959	4.41508	0.951791	2.64236	0.392037
37	SVBB	Ku	undifferentiated	undifferentiated		Morris et al., 2019	29.8806	-115.374	0.512852	6.94738	0.70393	18.4425	15.569	38.1454	1.57	52.0077	0.920173	20.2454	9.34908	0.127384	3.36792	10.6402	2.89396	0.34541	0.102806	31.8336	295.614	12.573		7.92	3.861	209.053	22.8644	66.231	1.27276	0.193741	123.031	3.68735	9.65334	1.557	7.98664	2.64525	0.96976	3.53533	0.64065	4.21557	0.881001	2.50605	0.368325
41	SVBB	Kpsf-m	plutonic rock	plutonic rock		Morris et al., 2019	29.9482	-115.325							1.25878	53.8113	0.808355	20.2566	7.43041	0.119196	3.21686	9.76566	3.81085	0.673784	0.106978	30.4414	231.182	31.164		9.31	11.662	261.917	25.1765	80.9	1.44478	0.250205	173.87	4.64093	11.7934	1.91351	9.79366	3.1269	1.0657	3.94385	0.719399	4.72793	1.01462	2.78846	0.403899
46	SVBB	Kpsf-m	plutonic rock	cumulate	x	Morris et al., 2019	29.9436	-115.326	0.512846	6.81421	0.703727	18.5089	15.5662	38.2202	1.51002	50.756	0.509705	18.6756	8.04495	0.184262	6.48742	12.619	2.28531	0.377453	0.0603184	52.7497	167.286	116.032		30.086	10.388	201.958	13.3942	24.6	0.405483	0.248887	73.7384	1.56142	3.99579	0.679516	3.8313	1.48887	0.547144	2.04193	0.381723	2.50269	0.521098	1.47361	0.209717
48	SVBB	Kav	alt volcanic rocks	undifferentiated		Morris et al., 2019	29.9326	-115.326	0.51285	6.896	0.70463	18.4047	15.566	38.1295	1.50076	59.4184	1.29952	17.0069	6.21709	0.18196	2.61738	7.8522	4.48545	0.729662	0.191414	38.1525	110.32	0.001		0.4925	12.1155	313.735	59.5138	145.1	3.22889	0.339065	379.898	9.87776	29.4411	4.77502	23.8152	7.187	1.96326	8.98005	1.62545	10.7203	2.28447	6.403	0.922356
55	CE	Kh-m	hypabyssal intrusion	hypabyssal intrusion	x	Medynski	29.9567	-115.345								50.7707	1.13895	16.4968	2.94558	0.0956002	7.36889	19.0681	1.86908	0.143982	0.10227	39.6052	344.134	188.21	19.26	26.3133	3.51601	199.622	25.869	51.767	1.75836	0.216897	28.0813	7.95218	24.3393	3.62817	16.5564	4.39544	2.0551	4.79002	0.787456	5.06039	1.07622	2.93937	0.424713
56	CE	Kl-m	volcanic rock	lavas etc	x	Medynski	29.9579	-115.343								54.5365	1.82626	17.3576	6.62532	0.0677089	2.73971	10.9601	5.34272	0.282538	0.261521	44.3085	399.351	0.001	4.78433	17.4591	3.73944	234.061	42.9793	110.042	2.9972	0.0692472	64.8814	10.2358	26.2471	3.49962	15.8928	4.76653	2.56784	6.33179	1.17285	7.8975	1.70986	4.73635	0.704624
60	SVBB	Ku	undifferentiated	undifferentiated		Morris et al., 2019	29.9164	-115.318							1.05955	66.3788	0.856649	14.7769	6.31956	0.0956924	1.52501	4.02953	4.9474	0.85036	0.220104	20.0628	73.9735	3.0535		1.6745	29.6485	182.239	34.5354	158.1	2.75105	0.461126	209.313	5.69334	14.0589	2.27153	11.6015	3.908	1.33013	4.94539	0.943391	6.14306	1.31433	3.74338	0.552531
64	SVBB	Ku	undifferentiated	undifferentiated		Morris et al., 2019	29.9208	-115.31	0.512841	6.73023	0.703777	18.4888	15.5646	38.1838	1.00508	57.3185	0.998705	17.8581	8.64132	0.158678	2.58606	7.86472	3.51407	0.918378	0.141515	27.9645	215.518	12.7065		7.1905	28.959	204.276	31.9917	92.5	1.93242	1.02524	276.832	6.3134	15.2349	2.36706	11.9869	3.97222	1.1835	4.8146	0.892394	5.7547	1.23434	3.42783	0.499264
73	SVBB	Kpsf-m	plutonic rock	plutonic rock		Morris et al., 2019	29.9116	-115.293	0.512811	6.14596	0.703759	18.3955	15.5741	38.1268	0.78027	51.4225	1.24909	17.3363	9.90865	0.161645	5.80441	10.5701	3.01253	0.373345	0.161505	36.6904	314.018	104.016		56.145	9.062	218.932	27.5459	65.3	1.62274	0.435357	106.562	4.47976	11.5954	1.87424	9.70975	3.31932	1.23537	4.30461	0.78461	5.08428	1.0976	3.07976	0.448443
74	SVBB	Kav	alt volcanic rocks	undifferentiated		Morris et al., 2019	29.9124	-115.293							0.456018	59.1398	1.66387	14.2088	9.38395	0.216433	2.8765	5.14181	5.11959	1.84687	0.402404	32.3116	194.636	0.001		1.576	36.445	143.176	59.5636	260.7	6.48703	0.684542	296.729	15.5821	39.3848	5.96907	28.7795	8.37831	2.11382	9.6275	1.70031	10.9194	2.3335	6.56306	0.971618
80	SVBB	Kl-s	volcanic rock	lavas, lava domes, and B&AFTs		Morris et al., 2019	29.865	-115.318	0.512787	5.67256	0.705121	18.124	15.551	37.9755	1.9741	70.5639	0.423885	14.7952	4.22541	0.112145	0.978623	0.687013	6.17286	1.89569	0.145291	8.87639	44.296	1.47		2.94	26.558	130.649	34.9669	136.1	2.72379	0.1586	1757.31	12.9985	24.4663	3.77297	17.0443	4.55898	1.2078	5.38245	0.903783	5.74174	1.2299	3.40169	0.523006
86	NFBB	Ku	undifferentiated	undifferentiated		Medynski	30.1684	-115.484								70.4769	0.547089	14.2075	2.09092	0.0484218	1.41609	5.81608	5.06864	0.25665	0.0717112	19.3688					4.10544	203.525	43.6781	172.288	4.4798	0.109983	148.404	8.16325	26.972	4.33492	20.3365	5.78054	1.92161	6.6332	1.19561	7.85746	1.70734	4.67998	0.71313
87	NFBB	Ki	ignimbrite	ignimbrite		Medynski	30.1806	-115.485								76.3436	0.361193	11.7291	3.21235	0.00646052	0.0718329	0.894216	4.62414	2.69618	0.0609913	11.0462	20.1838	4.29703	6.74713	1.6212	46.5309	60.5129	49.0972	195.459	4.90525	0.127304	706.33	11.2072	27.1138	3.9375	18.0973	5.39439	1.51509	6.64791	1.24972	8.59695	1.91253	5.48429	0.807162
94	NFBB	Ki	ignimbrite	ignimbrite		Medynski	30.1806	-115.485								69.2174	0.599488	13.5495	6.0936	0.051709	1.18791	1.32408	6.77823	1.08316	0.11494	17.8064	76.344	22.1165	14.0851	7.89984	14.7816	29.6157	47.1456	146.555	4.536	0.134122	233.662	10.2228	23.3172	3.3998	15.9132	5.15858	1.25401	6.53532	1.25073	8.5274	1.85796	5.31003	0.785682
97	NFBB	Kplm-f	plutonic rock	plutonic rock	x	Medynski	30.1881	-115.457								76.152	0.162604	12.8681	1.58193	0.0474185	0.300712	1.24785	3.37798	4.23319	0.0282057	5.79034	64.8449	7.27133	7.84682	2.27909	25.4467	169.152	10.2681	179.462	3.11112	0.723109	52.9959	4.557	12.8274	1.83811	7.42853	1.78236	0.511146	1.75316	0.289609	1.86002	0.397169	1.18727	0.179509
98	NFBB	Kh-s	hypabyssal intrusion	hypabyssal intrusion		Medynski	30.1908	-115.487								70.2929	0.730075	14.3611	3.73664	0.162719	0.808869	2.16098	4.38824	3.20576	0.152629	13.8792	57.9652	0.001	3.98569	4.17834	78.5793	260.29	44.6027	207.789	5.97493	0.523892	1062.14	15.1492	35.2311	4.96977	21.9644	6.07777	1.48898	6.8838	1.24252	8.12247	1.74325	4.94839	0.753386
102	NFBB	Kvf-s	volcaniclastic rock	volcaniclastic		Medynski	30.1906	-115.49								71.4278	0.594774	13.0933	5.40516	0.039327	0.733384	1.14734	6.40494	1.02541	0.128618	17.3055	102.448	8.20601	50.3068	4.26169	0.773934	189.849	43.0924	150.955	2.94188	0.0426285	17.0614	8.4944	21.2562	3.28939	15.913	4.98264	1.2281	6.16152	1.13524	7.48085	1.63522	4.76456	0.711802
103	NFBB	Kplm-f	plutonic rock	plutonic rock		Medynski	30.1879	-115.479								66.8561	0.740582	15.6901	3.47253	0.0250334	2.01725	6.34974	4.46072	0.351498	0.0364132	14.7299	115.052	18.0329	16.1919	9.87607	5.57696	152.246	40.2835	231.92	4.54715	0.0538786	157.46	4.72064	13.1539	2.30225	11.9876	4.10942	0.940109	5.28524	0.979156	6.78385	1.44854	4.22485	0.645948
104	NFBB	Kplm-ma	plutonic rock	plutonic rock		Medynski	30.1876	-115.479								51.1464	0.799026	15.7925	10.9062	0.217834	7.57096	11.0721	1.79103	0.671776	0.0321821	30.5127					11.8868	282.871	18.2545	50.221	1.30057	1.57157	88.8278	4.40124	10.6269	1.56353	7.52194	2.32393	0.794658	2.83561	0.504735	3.30713	0.71989	1.93945	0.285319
105	NFBB	Kplm-f	plutonic rock	plutonic rock	x	Medynski	30.1871	-115.478								75.8076	0.30706	13.2658	0.912199	0.0143494	0.724551	3.2061	5.19932	0.558437	0.00455648	5.4049	40.0984	4.25318	29.1416	4.07336	139.738	86.6392	18.1212	120.306	1.52076	0.906446	481.886	15.8415	30.5539	3.43877	12.5511	2.67094	0.650737	2.65693	0.46454	3.03161	0.663024	1.99897	0.330662
106	SVBB	Kl-m	volcanic rock	lavas, lava domes, and B&AFTs		Morris et al., 2019	29.901	-115.36	0.512813	6.17099	0.704583	18.3782	15.5721	38.0931	2.16648	54.6431	1.70239	14.7546	12.3408	0.306839	4.04413	7.98178	3.1561	0.840052	0.230172	41.3	363.563	0.001		14.6765	18.124	250.488	45.9592	104.2	2.4832	0.527816	207.075	6.73924	17.6863	2.88951	15.339	5.18503	1.66719	6.96979	1.26188	8.48901	1.83218	5.1573	0.747107
108	SVBB	no label - dike	hypabyssal intrusion	hypabyssal intrusion		Morris et al., 2019	29.901	-115.359	0.512852	6.94245	0.70522	18.2141	15.552	37.9363	2.77529	55.8192	1.4041	15.799	12.1951	0.296874	3.9186	4.61103	5.15641	0.601306	0.198361	40.9604	255.411	1.8715		2.6595	13.2975	255.432	40.4613	88.3	2.14227	0.53069	169.1	6.06081	15.8692	2.61014	13.3584	4.55615	1.26255	5.99178	1.13739	7.38238	1.6082	4.48327	0.661792
113	CE	Kim	ignimbrite	ignimbrite		Medynski	29.8967	-115.363								56.0183	1.08118	16.7922	10.4601	0.237092	3.48737	7.5419	3.97683	0.274611	0.130395
115	CE	Kim	ignimbrite	ignimbrite		Medynski	29.8925	-115.364								67.9214	0.651843	14.2108	5.01561	0.122067	1.43824	4.38326	6.05066	0.0630376	0.143096	34.9371	345.745	29.3689	187.171	12.409	5.22401	527.631	27.121	56.147	1.38262	0.0636499	110.071	3.93838	10.2292	1.65768	8.82143	3.13737	1.13508	4.09748	0.745651	5.15736	1.0738	3.15265	0.455741
118	SVBB	Kh-m	hypabyssal intrusion	hypabyssal intrusion		Morris et al., 2019	29.9071	-115.361	0.512825	6.41085	0.703815	18.4735	15.5651	38.1741	1.40341	55.6453	1.68047	14.527	12.5013	0.199681	3.73403	7.92441	3.12974	0.431192	0.226864	41.7036	363.76	0.001		15.4645	10.7365	202.499	45.8174	103.4	2.4422	0.210822	174.301	7.03748	18.2376	2.99514	15.4517	5.27563	1.69078	6.91643	1.28116	8.32679	1.82006	5.05105	0.737403
120	SVBB	Kh-m	hypabyssal intrusion	hypabyssal intrusion		Morris et al., 2019	29.9063	-115.362							1.78046	54.365	1.57872	15.0403	12.5472	0.346488	4.28621	7.93309	3.23122	0.478658	0.193076	42.4003	385.726	0.001		13.987	11.426	217.018	39.2781	79.3	1.91503	0.398946	151.804	5.46505	14.3384	2.37531	12.6366	4.44619	1.45901	5.81653	1.08808	7.28222	1.5558	4.37987	0.639909
121	SVBB	no label - dike	hypabyssal intrusion	hypabyssal intrusion		Morris et al., 2019	29.9037	-115.363							2.86585	65.7396	0.957006	14.3609	7.01092	0.116867	2.04725	3.67792	4.58796	1.27852	0.223123	22.7538	54.88	1.764		0.882	24.794	163.002	51.8235	173.5	3.69584	0.139597	194.433	10.0146	26.178	4.12164	20.22	6.40035	1.61959	7.8299	1.43646	9.32106	2.00591	5.58244	0.829402
124	SVBB	Ku	undifferentiated	undifferentiated		Morris et al., 2019	29.8624	-115.363	0.512835	6.60752	0.704584	18.4727	15.5573	38.175	3.72799	61.6149	0.935997	14.8031	7.84557	0.232159	2.78055	6.35989	4.26485	0.950206	0.212833	26.5618	92.196	27.0875		12.805	9.653	213.216	37.4115	96.2	2.10957	0.232049	225.639	6.07852	15.894	2.57534	13.6218	4.55373	1.46289	5.85302	1.0498	6.77989	1.45416	4.06946	0.597728
127	CE	Kl-i	volcanic rock	lavas etc		Medynski	29.989	-115.423								59.3165	1.36535	15.5536	10.0481	0.194762	3.12981	5.76786	3.9896	0.368318	0.266021	30.7548	187.508	0.001	6.04175	2.38153	3.4756	157.42	45.4397	118.559	2.88343	0.0968946	147.514	8.06882	20.3351	3.25319	16.5994	5.40267	1.73347	7.00825	1.28428	8.39612	1.80589	5.07319	0.743619
128	CE	Kvf-m	volcaniclastic rock	volcaniclastic		Medynski	29.9945	-115.42								53.7828	1.40452	15.2511	11.876	0.165695	5.51539	5.43009	6.38702	0.0305353	0.15683	40.11	509.344	54.1309	11.8369	36.9764	0.229709	76.7004	31.8723	68.1791	1.6754	0.00949105	11.8373	4.65285	11.7404	1.9402	10.3336	3.69256	1.36141	4.94501	0.896183	5.84714	1.25487	3.52641	0.516437
131	CE	Kl-m	volcanic rock	lavas etc		Medynski	29.9924	-115.407								53.3297	1.21737	18.0272	9.87152	0.162808	4.12038	7.59702	4.82242	0.714031	0.13763	47.5472	521.808	93.3946	42.1852	28.6318	1.73729	160.631	32.6301	72.9725	1.77744	0.277059	29.5096	4.88527	12.0051	1.9539	10.3179	3.7624	1.19438	4.93396	0.898612	5.88745	1.27239	3.58549	0.522285
141	CE	Kh-m	volcanic rock	lavas etc	x	Medynski	29.9924	-115.407								55.3152	1.60989	15.1409	12.2209	0.234514	3.69757	6.8424	3.93344	0.77955	0.225658	37.6559	436.746	30.8085	5.42524	24.442	25.8933	214.978	46.2053	60.8437	1.57138	1.28012	208.794	2.54943	9.81549	1.98779	12.454	6.66007	2.12472	9.36135	1.67953	10.4569	2.03831	5.33161	0.736093
149	CE	Kl-i	volcanic rock	lavas etc		Medynski	29.9833	-115.392								62.3765	1.34259	14.3662	9.18093	0.0659992	1.17293	3.2813	7.41985	0.250926	0.542779	27.3598					3.54873	102.728	49.1814	116.709	2.93802	0.0507615	54.9311	7.9206	22.2271	3.56296	17.9021	5.7179	1.49362	7.32451	1.26355	8.3237	1.72828	4.79114	0.688095
151	CE	Kl-i	volcanic rock	lavas etc	x	Medynski	29.9804	-115.39								64.4476	1.05353	15.2937	6.30417	0.10184	2.42345	2.47259	7.17071	0.533512	0.198844	27.5418	51.2966	0.001	3.08252	1.75481	1.34601	90.5674	83.6338	200.152	5.05237	0.0455631	29.2901	12.8877	31.7687	5.11028	25.7855	9.51201	2.82842	13.0354	2.4808	16.3906	3.29728	9.0495	1.27748
155	CE	Ki-A	ignimbrite	ignimbrite		Medynski	29.9825	-115.382								76.1963	0.549792	13.036	1.35668	0.00832972	1.95636	0.439313	6.32569	0.0468482	0.084646	11.8479	15.36	0.001	1.60291	0.752063	1.09643	42.0201	54.8805	219.811	4.77761	0.0688362	16.0502	5.00189	11.8637	1.93098	9.81632	3.42241	0.860525	5.30178	1.15344	8.85993	2.01389	5.979	0.910057
161	CE	Kl-m	volcanic rock	lavas etc		Medynski	29.9946	-115.393								53.4734	1.35458	15.4109	11.6494	0.112104	5.32569	9.1728	3.22828	0.111217	0.161771	41.5593	516.85	27.7874	99.3668	22.8215	8.65761	190.163	31.5688	74.0791	1.91131	1.02659	82.0631	5.5903	14.0411	2.21809	11.0292	3.61116	1.28447	4.82271	0.88301	5.83513	1.24986	3.44663	0.509768
162	CE	Kplb-m	plutonic rock	cumulate	x	Medynski	29.9945	-115.382								56.3283	1.18051	17.9393	3.97839	0.092917	4.88983	9.93187	5.06189	0.407619	0.189399	38.5737	288.655	103.689	11.0852	19.4989	10.7972	161.785	90.8861	77.3638	6.20766	0.100992	341.299	6.6578	20.0869	3.75922	20.7566	8.41214	1.45488	11.6672	2.24973	15.0788	3.27954	9.44259	1.43043
163	CE	Kplb-f	plutonic rock	plutonic rock		Medynski	29.9896	-115.37								73.7902	0.48483	12.0554	5.43305	0.0637	0.519959	2.78695	4.32353	0.421979	0.120326	22.2952					0.878811	54.1982	60.2818	251.603	4.83271	0.0367056	14.3712	15.0896	37.0667	5.52662	25.3918	7.49359	1.56994	8.92176	1.60946	10.5359	2.28872	6.45937	0.970645
164	CE	Ki-A	ignimbrite	ignimbrite		Medynski	29.9833	-115.375								76.3147	0.513535	11.9862	2.83346	0.0953246	0.850663	1.37783	5.68411	0.322713	0.021481	13.6817	45.3768	1.89055	37.7395	1.01293	8.82134	132.856	42.0467	186.818	4.15876	0.168757	67.7604	21.8538	50.4665	7.39554	34.4267	9.99659	3.12776	10.6548	1.61946	8.8223	1.63194	4.14437	0.571067
165	CE	Ki	ignimbrite	ignimbrite		Medynski	29.9745	-115.367								73.501	0.529671	12.1325	5.08645	0.0250609	0.562488	0.207916	1.68972	6.18987	0.075316	12.0879	18.8826	0.145427	6.72585	3.54526	85.5185	48.0966	56.2259	208.785	4.85569	0.184874	1259.26	10.542	26.8664	3.98184	18.8769	5.9961	2.29276	7.4392	1.41974	9.60681	2.05592	6.0191	0.912622
167	CE	Kld	volcanic rock	lavas etc		Medynski	29.9721	-115.368								65.0522	0.842211	14.9322	7.73946	0.116368	1.9343	1.93978	5.77893	1.46381	0.200769	18.6929	126.323	0.001	49.572	2.91218	17.5951	52.9854	45.4111	163.299	3.74558	0.0822206	416.339	9.2424	23.6813	3.55121	16.7069	5.06447	1.22584	6.4308	1.22968	8.36174	1.81962	5.12525	0.779864
169	CE	Ki	ignimbrite	ignimbrite		Medynski	29.975	-115.371								74.3044	0.571952	13.495	3.52936	0.00859505	0.171057	0.154029	4.00167	3.68142	0.0824718	12.4104	21.0783	0.145427	122.435	0.886314	46.4251	53.1909	52.8254	224.087	5.3403	0.0802711	904.689	12.0392	28.3267	4.26948	19.7418	5.87508	1.53819	7.19112	1.39403	9.39706	2.0995	6.26684	0.954209
173	SVBB	Kpsf-f	plutonic rock	plutonic rock		Medynski	29.9508	-115.356								67.036	0.629174	14.7086	4.92194	0.0989955	2.17054	4.95912	3.52384	1.86235	0.0894179	25.8774	149.253	0.001	0.739806	1.12809	13.1187	104.71	38.0604	124.772	3.04963	0.0754941	153.603	8.84963	21.9328	3.36601	16.3037	5.18956	1.63686	5.8612	1.06312	6.78067	1.45154	4.27425	0.636985
178	CE	Kh-s	hypabyssal intrusion	hypabyssal intrusion		Medynski	30.0442	-115.363								69.5832	0.878875	12.6406	5.57747	0.0897949	1.80844	1.34086	4.40925	3.52505	0.146447	18.2997	155.745	1.59969	1.99284	3.16541	65.5417	25.2868	50.6627	247.415	4.54652	0.141021	554.023	8.42284	21.4795	3.25728	15.4698	5.13811	1.10031	6.87618	1.32756	9.0853	1.94856	5.6316	0.848659
181	CE	Kl-s	volcanic rock	lavas etc		Medynski	30.0286	-115.454								67.8013	0.958357	14.4277	6.551	0.107388	1.2979	1.04656	7.45532	0.0655176	0.288897	22.9474					1.29506	38.431	53.7473	150.571	3.71237	0.129929	19.633	10.5629	25.6834	4.1072	20.1452	6.48909	1.94984	8.36081	1.48426	9.80748	2.10254	5.87522	0.868364
183	CE	Kplb-m	plutonic rock	plutonic rock	x	Medynski	30.0212	-115.445								56.6137	1.2007	15.539	9.69799	0.185741	4.56979	8.68152	2.60448	0.763421	0.14364	21.6837					2.07	171.412	76.339	202.777	3.74038	0.12277	80.9297	15.7143	40.5619	6.20973	30.3742	9.39598	1.50166	11.7428	2.03553	13.1477	2.78753	7.67886	1.11208
184	CE	Ku	undifferentiated	undifferentiated		Medynski	30.0217	-115.444								68.6436	0.944538	12.7981	5.78025	0.108702	1.4975	2.9061	7.09146	0.0517164	0.177974	18.4277	176.785	30.9525	4.80874	11.7823	23.6247	153.693	41.3904	152.914	2.91523	0.158818	399.864	9.80748	23.1641	3.54521	16.4769	4.86402	0.979002	5.9013	1.06519	7.09197	1.536	4.34777	0.645487
185	CE	Kbat-s	volcaniclastic rock	volcaniclastic		Medynski	30.0224	-115.447								69.4976	0.629753	15.0342	4.63675	0.0302718	0.382305	0.839975	8.6482	0.0276499	0.273257	15.9812					0.475447	20.4058	47.4896	170.821	3.89107	0.0203568	16.1915	5.86042	21.4069	3.69197	17.5856	5.39395	1.43286	6.59568	1.20212	8.03502	1.81965	5.26505	0.810959
188	CE	Kl-s	volcanic rock	lavas etc		Medynski	30.033	-115.45								66.6035	0.895068	15.4402	5.11099	0.0188763	1.05676	1.91953	8.62609	0.111786	0.217133	21.6927					1.05994	38.0489	50.9123	142.221	3.33751	0.0693774	13.5955	8.50857	20.8408	3.26321	16.2253	5.39195	1.6063	7.08201	1.34507	9.08935	1.96234	5.5513	0.821476
197	CE	Kl-s	volcanic rock	lavas etc		Medynski	30.0697	-115.434								70.0849	0.989075	13.503	4.57519	0.0162898	0.746345	2.14226	7.61304	0.0509906	0.278852	18.2911					1.40255	64.7728	70.7208	207.451	5.01548	0.105435	538.528	13.0715	27.3525	4.42358	21.0698	6.91348	1.9054	9.14537	1.74032	11.8994	2.58523	7.1197	1.03598
198	CE	Ki-A	ignimbrite	ignimbrite		Medynski	30.0606	-115.451								75.409	0.549178	12.4684	3.52507	0.0316776	0.357697	0.394678	5.30087	1.87024	0.0931454	12.4585					29.9482	40.0441	96.9783	218.878	5.00441	0.41418	334.843	12.0519	24.4867	4.42227	20.9777	7.03829	1.80253	10.7261	2.15732	15.2435	3.36166	9.24167	1.3559
200	CE	Ki-A	ignmibrite	ignimbrite		Medynski	30.0751	-115.424								74.2985	0.54384	12.1653	5.64136	0.0170718	0.820218	0.390309	4.95737	1.06118	0.104835	12.4875					22.7084	29.855	56.7496	209.555	4.93487	0.100853	72.2671	6.08141	14.8286	2.51254	12.1287	4.27909	1.20254	6.38565	1.30519	9.28169	2.12514	6.27952	0.984943
203	CE	Kplb-m	plutonic rock	cumulate	x	Medynski	30.0375	-115.44								51.0707	0.48526	22.3133	5.68404	0.0920175	4.86018	12.6295	2.57668	0.214448	0.0738422	49.4974					4.2303	245.779	31.1801	36.4977	1.36176	0.479517	63.3166	3.13975	10.1575	1.9368	10.8789	4.1484	1.05391	5.34356	0.964132	6.25446	1.29299	3.57688	0.518584
206	CE	Kplb-f	plutonic rock	plutonic rock		Medynski	30.0391	-115.438								63.6065	0.972761	12.6704	8.53891	0.090103	1.94822	6.66275	4.44191	0.179056	0.889454	36.3815	494.359	8.73729	161.686	11.7225	85.8966	145.488	40.8514	127.792	3.37483	2.95976	325.279	11.8025	26.8009	3.73004	16.4784	5.01675	1.2628	6.10282	1.11985	7.60199	1.61349	4.50665	0.669228
208	CE	Kbat-s	volcanic rock	lavas etc		Medynski	30.0283	-115.455								73.2595	0.606257	13.4944	3.83768	0.0498221	0.543321	0.55004	7.40061	0.0873813	0.170962	15.8821					1.70884	44.774	42.2522	169.863	3.69107	0.0690278	21.0267	12.1829	27.3637	3.81658	17.1706	4.99504	1.22429	6.16495	1.16274	7.83763	1.72216	4.94094	0.776325
209	CE	Kbat-s	volcanic rock	lavas etc		Medynski	30.0278	-115.453								66.3625	0.835349	15.2309	5.94569	0.0853591	2.67146	0.823677	7.80048	0.044707	0.199821	20.2867					0.694633	22.275	44.2737	152.233	3.56256	0.0574055	21.2299	10.8456	24.5188	3.72616	17.5728	5.41049	1.34929	6.65639	1.22637	8.2041	1.77985	4.98703	0.759493
211	CE	Kl-m	volcanic rock	lavas etc		Medynski	29.9845	-115.433								53.8622	1.26288	16.5464	10.0647	0.226528	3.02429	10.9322	3.40477	0.522251	0.153814	37.4272	436.311	0.001	45.8679	9.52613	14.8274	201.627	40.2555	87.8816	2.28855	0.501626	225.177	6.33844	16.1632	2.63701	13.7039	4.66402	1.59416	6.25523	1.14029	7.60429	1.59213	4.47523	0.664587
215	NFBB	Kplm-i	plutonic rock	plutonic rock		Medynski	30.1886	-115.472								61.2487	0.7675	15.2144	7.16499	0.127567	3.73894	7.08025	2.84837	1.71284	0.096427	14.3241					4.90582	33.278	41.7099	205.531	4.42752	0.0503986	44.4573	23.5456	49.7802	6.63583	28.9676	7.00154	1.39575	7.21732	1.21118	7.66988	1.65997	4.83877	0.753831
216	NFBB	Ki	ignmibrite	ignimbrite		Medynski	30.1819	-115.485								70.9777	0.585833	13.2747	4.83866	0.0441802	0.810615	1.40625	6.75817	1.19614	0.107724	17.9166					19.4202	29.6892	45.7369	156.878	4.79933	0.103765	279.215	8.70124	23.8458	3.63891	16.8419	5.23244	1.20942	6.48711	1.19575	8.10647	1.7845	5.18174	0.785864
218	NFBB	no label - dike	hypabyssal intrusion	hypabyssal intrusion		Medynski	30.1722	-115.485								51.8468	1.17984	18.0632	10.2826	0.190224	4.65971	10.1217	3.29684	0.243401	0.115607	43.9198					48.213	155.104	21.0552	37.0834	1.00685	1.28207	143.458	3.20263	8.03402	1.22945	6.1416	2.12474	0.858591	2.98433	0.544375	3.81436	0.835736	2.35983	0.347244
221	NFBB	Ki	ignimbrite	ignimbrite		Medynski	30.1698	-115.486								70.0974	0.615518	13.507	6.21324	0.0219831	0.661752	0.962914	6.47839	1.31068	0.131136	19.2387					18.7902	32.0971	45.1727	145.29	4.56937	0.105324	190.88	16.6675	34.2509	4.75428	20.6723	5.87951	1.31507	6.69161	1.22035	8.07711	1.71775	4.90711	0.748392
223	NFBB	Kplm-f	plutonic rock	plutonic rock		Medynski	30.1686	-115.483								71.8834	0.529089	14.3792	3.42088	0.0429138	0.6222	3.68665	4.46574	0.941253	0.0286797	11.5454					32.0684	92.8659	50.6192	233.036	4.8691	0.155587	492.878	8.12046	19.2177	3.18561	15.4044	5.28658	0.919852	6.69347	1.30616	8.85073	1.93179	5.60377	0.870258
225	NFBB	Kplm-f	plutonic rock	plutonic rock		Medynski	30.182	-115.413								68.0163	0.594362	14.3951	5.0691	0.0841066	1.89531	4.41197	3.35028	2.10791	0.0754916	13.6982					68.3161	157.1	34.4063	231.141	5.48197	0.53232	583.781	8.25896	20.4661	3.1092	14.4075	4.18465	1.01225	4.93333	0.908549	6.04625	1.29513	3.63471	0.553544
228	CE	Ku	undifferentiated	undifferentiated		Medynski	29.9623	-115.327								68.1596	1.01617	13.6365	7.05935	0.231709	0.989085	1.91326	6.51482	0.209406	0.270053	19.9982					2.97138	66.0944	46.9182	148.217	3.35096	0.116894	94.0741	5.97422	16.3451	2.76695	14.5974	5.10296	1.11666	7.02335	1.30514	8.6878	1.86653	5.24381	0.784131
232	SVBB	Kpsf-m	plutonic rock	cumulate	x	Medynski	29.963	-115.321								50.0089	1.11867	17.9838	7.8473	0.204176	7.1135	11.9469	3.13766	0.492003	0.147067	38.4838					4.4544	209.173	19.0437	50.6208	1.11243	0.0829233	73.548	2.73006	6.71494	1.14872	6.48848	2.3331	0.970834	3.03622	0.559635	3.65082	0.775204	2.09029	0.305229
233	SVBB	Kpsf-f	plutonic rock	plutonic rock	x	Medynski	29.9625	-115.316								66.4493	0.805158	15.2579	2.563	0.0434758	2.39175	7.71707	4.30481	0.298971	0.168492	56.1149					1.06846	101.567	25.4476	130.014	0.566001	0.068781	8.89514	1.51687	4.81038	0.838899	4.27396	1.48773	0.371706	2.25066	0.468828	3.56558	0.873508	2.85129	0.490444
234	CE	Kh-s	hypabyssal intrusion	hypabyssal intrusion		Medynski	29.9615	-115.32								71.6584	0.82491	14.2099	1.08224	0.0489208	1.25208	5.0374	5.4995	0.236594	0.150028	17.8788					3.30046	174.568	44.8717	170.925	3.54953	0.0236539	51.2337	7.5566	22.4332	3.4949	16.5853	5.12089	1.04782	6.19447	1.14041	7.72369	1.71875	4.94215	0.765634
236	CE	Kav	alt volcanic rocks	undifferentiated		Medynski	30.0763	-115.356								61.3481	1.46319	14.1864	9.52522	0.168061	2.41518	5.9052	4.34326	0.374123	0.271267	31.448					7.75954	150.693	50.0917	176.729	3.60215	0.0796197	117.627	10.6008	26.0153	3.93339	19.4246	6.0499	1.55245	7.74214	1.4126	9.23575	2.02477	5.53406	0.804898
241	NFBB	Kplm-i	plutonic rock	plutonic rock		Medynski	30.1129	-115.355								59.544	0.874672	16.4391	7.40694	0.148666	3.06411	8.10166	3.80403	0.473958	0.142875	28.8336					59.9357	135.913	31.2	133.796	4.38997	2.26965	343.769	12.861	28.5976	3.77679	15.8459	4.2497	0.873767	4.83002	0.875306	5.60697	1.20257	3.47334	0.511543
242	NFBB	Kav	alt volcanic rocks	undifferentiated		Medynski	30.1686	-115.483								73.4007	0.626951	12.9558	4.03686	0.147961	0.649498	1.00965	6.7873	0.284099	0.101172	17.2592					29.0358	168.452	28.8008	206.448	5.7616	0.285355	343.982	5.82227	14.1764	1.96646	8.52372	2.6907	1.12325	3.54668	0.694751	4.80121	1.0632	3.08543	0.488435
246	NFBB	kplm-ma	plutonic rock	plutonic rock		Medynski	30.1021	-115.345								45.4858	1.10012	16.9653	13.2328	0.213091	8.79154	12.6589	1.29161	0.231018	0.0297233	48.3908	455.086	248.68	61.9027	31.7807	23.0646	133.227	17.0742	28.5991	1.8831	0.972039	134.502	4.4321	9.85843	1.39606	6.39043	2.00642	0.651751	2.42999	0.45699	3.16657	0.682498	1.91379	0.28979
250	NFBB	Kplb-f	plutonic rock	cumulate	x	Medynski	30.0447	-115.287								73.9953	0.546429	12.5366	3.64168	0.0559895	0.734013	2.09192	3.77572	2.52979	0.0925075	4.16903					98.472	142.119	10.7866	124.428	2.05776	0.68626	964.666	5.746	9.83378	1.14103	4.42318	1.05969	0.630108	1.25743	0.224849	1.52487	0.350545	1.13605	0.186896
252	CE	Kav	alt volcanic rocks	undifferentiated		Medynski	30.0698	-115.349								73.3535	0.669765	13.5694	3.10912	0.0161898	0.434703	0.855426	7.83979	0.0277062	0.12442	5.92363					0.575526	12.5867	15.209	198.849	4.37983	0.0216253	26.1471	0.596539	1.42408	0.333214	2.10201	0.882443	0.197451	1.34293	0.25155	1.86294	0.505962	1.84947	0.332218
125A	SVBB	Kpsf-f	xenolith	undifferentiated		Morris et al., 2019	29.8604	-115.366	0.512845	6.80203	0.704493	18.4655	15.5574	38.1656	1.70732	67.8304	0.821409	14.8084	2.15954	0.0857355	2.08842	8.03702	3.66654	0.334853	0.16776	20.8338	128.641	12.1155		2.955	6.5995	306.761	27.3192	109.5	2.21611	1.96683	232.571	6.36407	15.2512	2.01947	9.49427	3.02425	1.3932	4.07422	0.754293	4.8102	1.04885	2.91885	0.427925
125B	SVBB	no label - dike	hypabyssal intrusion	hypabyssal intrusion		Morris et al., 2019	29.8604	-115.366	0.512831	6.52205	0.705002	18.4775	15.5591	38.1808	4.57759	55.6687	1.08583	15.6184	10.8569	0.226523	4.78726	7.91048	3.08775	0.635404	0.122714	35.8437	322.587	35.46		21.473	8.3725	320.988	22.1773	55.9	1.18794	0.838889	254.215	3.40976	8.98738	1.47063	7.74903	2.67747	0.919667	3.47351	0.634811	4.19386	0.881098	2.47808	0.362687
130A	CE	Ki	ignimbrite	ignimbrite		Medynski	29.992	-115.4								66.7335	0.799182	14.5962	6.73781	0.00860336	0.736255	1.54726	8.52248	0.0516697	0.267021	11.7717	92.9897	5.72937	5.52038	21.1734	0.706846	20.2824	39.2355	166.843	3.92563	0.020776	5.90008	3.90387	13.0296	2.42981	12.2	3.81354	0.86175	4.92946	0.946424	6.51993	1.42355	4.26993	0.642016
130B	CE	Ki	ignimbrite (pumice)	ignimbrite		Medynski	29.992	-115.4								75.3504	0.522969	13.3926	1.14894	0.00838367	0.705218	1.2221	7.55692	0.0239086	0.0685643	8.52941	42.0102	2.1814	1.37008	2.65894	0.478615	42.1001	20.2579	181.189	2.42149	0.0127897	36.066	3.53208	10.6157	1.89262	9.41784	2.48724	0.441045	2.89177	0.481367	3.12056	0.695422	2.06081	0.312984
13D	NFBB	Kh-m	hypabyssal intrusion	hypabyssal intrusion		Medynski	30.1731	-115.556								53.6767	1.31128	16.6593	10.4464	0.1782	5.1507	8.68564	2.71454	1.02291	0.154375
177A	CE	Kplb-f	plutonic rock	plutonic rock		Medynski	29.9937	-115.335								71.2084	0.592145	12.9661	5.45475	0.0612723	1.33425	3.71727	4.21625	0.367916	0.0816897	10.4662	55.3304	2.61768	10.8361	1.5194	10.1262	191.867	27.0623	263.588	1.57225	0.638364	126.325	5.18456	11.3086	1.67613	8.15809	2.5529	0.718373	3.50035	0.653226	4.40258	0.987391	2.83907	0.441305
177B	CE	Kplb-m	plutonic rock	plutonic rock		Medynski	29.9937	-115.335								56.4346	0.854693	15.5212	11.8355	0.101348	3.61038	5.15955	5.7587	0.652907	0.0711029	36.7647					14.3205	143.378	33.0105	114.052	2.37665	0.567829	204.325	7.41652	17.9187	2.63934	12.4658	3.86045	1.13281	5.00137	0.902609	5.94762	1.28392	3.53292	0.533554
190A	CE	Kplb-m	plutonic rock	plutonic rock	x	Medynski	30.0361	-115.442								50.9795	0.61056	20.6895	6.51989	0.13608	5.55823	12.704	2.46608	0.27703	0.0591787	35.1556					51.389	192.359	23.3395	72.7369	2.95184	1.97818	284.949	9.17439	19.8594	2.62882	11.4239	3.0938	1.02081	3.66123	0.665519	4.39677	0.935605	2.55973	0.384395
190B	CE	Kplb-m	plutonic rock	cumulate	x	Medynski	30.0361	-115.442								52.0139	0.99774	18.6294	5.90533	0.110688	5.61326	13.0441	3.35754	0.226179	0.10188	33.2731					4.74923	188.818	13.7738	30.8808	0.6974	0.129065	122.471	2.27475	5.86371	0.929809	4.69642	1.58592	0.714273	2.10398	0.379078	2.5983	0.556065	1.5306	0.226544
21A	SVBB	Kpfs-f	plutonic rock	cumulate		Morris et al., 2019	29.9713	-115.234	0.512827	6.4576	0.704088	18.45	15.5728	38.1976	0.5	66.261	0.847948	15.9154	4.44174	0.170196	1.49722	5.38787	4.81754	0.635635	0.0255006	16.5858	172.062	5.742		3.96	13.464	245.618	12.6021	320.067	2.33652	0.165637	325.059	4.26612	7.33534	1.01242	4.51929	1.22187	1.23206	1.54774	0.291765	1.96638	0.451755	1.367	0.203066
21B	SVBB	Kpsf-i	plutonic rock	plutonic rock		Morris et al., 2019	29.9713	-115.234							0.49	57.8037	1.01838	16.6686	6.96862	0.147708	3.75637	8.84582	4.30739	0.34411	0.139364	31.2511	261.558	35.244		11.286	7.425	238.496	28.9401	124.641	3.27476	0.126076	158.264	4.41475	9.05715	1.45105	7.2744	2.53225	1.01219	3.65643	0.70129	4.87544	1.05629	3.01314	0.453225
222A	NFBB	Kplm-m	plutonic rock	cumulate		Medynski	30.1673	-115.483								55.9702	0.641363	17.0612	8.00847	0.169794	4.43831	8.55144	3.3561	1.73987	0.0632075	34.3029	293.869	66.7998	18.1252	5.1391	7.88594	209.444	46.0074	87.3433	2.30645	0.115128	103.179	5.43701	19.0745	3.74936	20.105	6.81684	1.5629	8.07165	1.43816	9.28417	1.9358	5.38604	0.771406
222B	NFBB	Kplm-f	plutonic rock	plutonic rock		Medynski	30.1673	-115.483								69.5018	0.548255	14.6283	4.0184	0.101177	1.13605	3.65959	3.63291	2.68318	0.0903259	21.5218					7.39766	246.865	38.3964	208.136	5.06981	0.191554	117.71	11.7257	34.0411	5.06954	21.6537	5.81191	1.49596	6.124	1.11131	7.07423	1.50604	4.19692	0.619847
224A	NFBB	Kplm-ma	plutonic rock	plutonic rock	x	Medynski	30.1868	-115.479								51.8368	0.758558	15.9229	9.90156	0.382257	8.27336	9.26134	3.1574	0.404212	0.101652	26.8051					4.80965	201.582	14.2677	29.6256	0.734022	0.199519	70.6442	2.69637	7.04247	1.11815	5.46379	1.68884	0.738258	2.20841	0.403354	2.61219	0.557411	1.56435	0.229736
224B	NFBB	Ku	undifferentiated	undifferentiated		Medynski	30.1868	-115.479								55.5424	0.822613	16.565	9.35078	0.153182	5.14834	8.23815	2.8704	1.22497	0.0841684	31.7333					70.5087	176.627	23.2365	75.65	2.14092	0.867509	398.479	7.56563	18.5298	2.58213	11.222	3.06188	0.862393	3.4736	0.629899	4.19434	0.895795	2.49052	0.370878
238A	CE	Kplb-f	plutonic rock	plutonic rock	x	Medynski	30.0689	-115.347								70.4198	0.591864	11.6975	9.29334	0.332138	1.47337	0.352326	3.42636	2.28492	0.128345	11.4879					53.2956	22.4651	24.3557	263.251	5.60664	0.115931	349.746	5.6081	12.6858	2.10662	10.4712	3.44159	0.450557	3.99819	0.687673	4.51419	0.957628	2.67627	0.406316
238B	NFBB	Kav	alt volcanic rocks	undifferentiated		Medynski	30.182	-115.413								66.7638	0.59631	17.7455	9.88603	0.0214557	2.85426	0.672512	1.37407	0.0511373	0.0349292	16.6528					86.1911	129.835	30.3934	223.745	3.99694	2.57191	337.723	13.6937	30.1467	3.89585	16.0377	4.04455	0.87065	4.45637	0.810624	5.32737	1.13681	3.25964	0.495159
26A	SVBB	Kvt-m	volcaniclastic rock	volcaniclastic		Morris et al., 2019	29.8891	-115.366							8.47	55.0966	0.714855	12.3071	6.86255	0.171818	3.16718	15.6179	2.04557	3.87171	0.144801	22.7477	119.394	30.294		22.968	53.856	237.333	36.1566	123.354	4.05335	0.162906	1000.12	15.0534	29.7712	4.15959	18.3309	4.93486	1.34207	5.56918	0.972255	6.20682	1.31431	3.6836	0.540669
26B	SVBB	Kvt-i	volcaniclastic rock	volcaniclastic		Morris et al., 2019	29.8891	-115.366	0.512803	5.97894	0.705529	18.565	15.578	38.2175	4.91	59.9102	0.717696	13.3278	5.13001	0.134005	2.73003	12.0122	4.28438	1.61615	0.137517	23.8393	103.95	20.493		11.979	24.849	255.591	45.7351	182.061	4.76815	0.126978	419.608	15.6628	34.2111	4.85059	21.446	5.97189	1.32	6.80924	1.23519	8.12457	1.73963	4.88813	0.733962
28A	SVBB	no label - dike	hypabyssal intrusion	hypabyssal intrusion		Morris et al., 2019	29.896	-115.363							3.01	54.9765	1.2238	18.1306	10.1197	0.305012	3.97569	3.89804	6.37028	0.847833	0.152598	37.2368	290.466	14.256		11.088	21.285	379.138	29.9532	69.399	1.6517	0.250108	630.901	5.01921	12.6955	2.05456	10.6121	3.58758	1.28874	4.63391	0.85601	5.63028	1.20178	3.28247	0.484014
28B	SVBB	no label - dike	hypabyssal intrusion	hypabyssal intrusion		Morris et al., 2019	29.896	-115.363							5.8	54.2226	1.38646	16.9388	10.8766	0.229746	2.95423	8.03787	4.60891	0.570048	0.174719	39.1999	311.454	5.544		8.91	17.325	311.109	33.3762	79.002	1.82287	1.07088	246.682	5.11619	13.5428	2.21048	11.4663	3.85112	1.3795	5.01592	0.934173	6.28618	1.32125	3.67692	0.545439
28C	SVBB	no label - dike	hypabyssal intrusion	hypabyssal intrusion		Morris et al., 2019	29.896	-115.363							6.19	54.7251	1.38273	15.9486	11.3822	0.239198	4.21884	6.89455	4.73342	0.30328	0.172065	41.898	315.909	29.502		14.256	10.494	331.188	32.4935	74.745	1.84422	1.35326	140.737	5.37617	13.8694	2.25069	11.4433	3.87772	1.34017	5.13224	0.940051	6.25014	1.31351	3.67627	0.536211
28D	SVBB	no label - dike	hypabyssal intrusion	hypabyssal intrusion		Morris et al., 2019	29.896	-115.363							3.45	61.24	1.13647	15.0672	9.50862	0.139786	2.4637	3.57213	6.56504	0.092221	0.214783	27.9699	162.459	0.001		3.465	2.277	181.455	39.7631	106.029	2.46937	0.183087	42.5696	6.81222	17.839	2.89439	14.7986	4.7705	1.60679	6.18637	1.15491	7.59855	1.58674	4.38589	0.635012
33A	SVBB	Kl-s	volcanic rock	lavas, lava domes, and B&AFTs		Morris et al., 2019	29.865	-115.371							3.45	65.2706	0.915463	15.0712	6.6273	0.243311	2.00627	4.41336	4.87773	0.363734	0.210992	26.376	87.318	6.138		3.267	4.554	281.773	38.4778	106.128	2.41398	1.36069	200.585	7.01944	17.6923	2.8037	14.263	4.72326	1.5127	5.92336	1.10376	7.13883	1.50172	4.18448	0.632932
33B	SVBB	Kl-s	volcanic rock	lavas, lava domes, and B&AFTs		Morris et al., 2019	29.865	-115.371							2.13695	65.3153	0.904906	14.7955	6.70841	0.225249	2.19055	4.20302	4.34084	1.10443	0.211832	26.0597	79.785	4.4325		2.4625	9.1605	199.352	37.7087	102.9	2.38231	0.285412	347.464	6.78221	17.2155	2.72687	13.9146	4.60974	1.50254	5.71906	1.05965	6.83675	1.49331	4.15942	0.604338
35A	SVBB	Ki-SF	ignimbrite	ignimbrite		Morris et al., 2019	29.8623	-115.37	0.512824	6.38556	0.705045	18.4484	15.5624	38.1712	1.88	70.9601	0.679811	13.5872	4.99832	0.113414	0.9061	2.35479	5.21391	1.04367	0.142712	20.6037	34.353	3.762		2.376	12.771	199.864	43.1351	128.403	2.81407	0.193657	378.584	8.08732	19.7374	3.23507	16.367	5.27769	1.5471	6.66367	1.22739	8.0868	1.72353	4.75866	0.709998
35B	SVBB	Ki-SF	ignimbrite	ignimbrite		Morris et al., 2019	29.8623	-115.37							2.17	68.2251	0.697594	14.9464	5.04767	0.178564	1.48391	2.97532	5.50463	0.762988	0.177833	21.5792	22.671	1.188		2.178	5.445	209.085	56.3295	149.094	3.34978	0.127069	252.378	9.02726	24.1199	3.8708	19.7417	6.59332	1.76611	8.4565	1.55217	10.212	2.2071	6.09415	0.917275
38A	SVBB	Ku	undifferentiated	undifferentiated		Morris et al., 2019	29.882	-115.375							2.3	55.5736	1.19159	16.2636	11.1845	0.207987	4.06366	7.0871	3.83755	0.454935	0.135405	38.9547	320.661	6.435		5.643	7.326	258.3	28.9996	65.934	1.47237	0.435618	153.727	4.67098	12.0374	1.90682	9.81413	3.2966	1.24926	4.36669	0.824177	5.41606	1.15331	3.14244	0.474514
38B	SVBB	Ku	undifferentiated	undifferentiated		Morris et al., 2019	29.882	-115.375							2.96	56.0185	1.21896	15.8555	11.4078	0.184267	3.98916	6.80837	3.64903	0.730882	0.137511	38.798	324.027	5.742		6.93	12.573	200.835	28.1513	66.132	1.49726	0.883676	217.9	4.32203	11.1866	1.81514	9.13311	3.26809	1.23514	4.13248	0.774822	5.29617	1.12655	3.14961	0.461152
47A	SVBB	Kpsf-f	plutonic rock	plutonic rock		Morris et al., 2019	29.9349	-115.324	0.512844	6.783	0.704064	18.667	15.5622	38.2441	0.953978	64.3179	0.868406	14.7602	7.37642	0.249304	2.08821	4.95734	3.93258	1.28061	0.169046	24.386	124.602	8.1755		2.0685	25.807	198.488	38.934	109.1	2.56804	1.10889	328.083	7.40943	19.9581	3.17547	15.8534	4.95474	1.40998	6.01627	1.09036	7.20243	1.48661	4.17337	0.624244
63A	SVBB	Kpsf-f	plutonic rock	plutonic rock		Morris et al., 2019	29.9218	-115.311	0.51286	7.09305	0.704142	18.4037	15.5597	38.1856	1.11007	65.613	0.920971	15.0442	5.5293	0.105843	1.85982	5.85938	4.5289	0.337518	0.201158	23.8938	109.956	8.722		3.528	5.39	240.971	37.6742	183.5	3.11134	0.324527	160.61	5.37996	13.0942	2.05382	10.9878	3.7784	1.26411	5.3099	0.941806	6.29776	1.37755	3.8933	0.595448
63B	SVBB	Kpsf-i	plutonic rock	plutonic rock	x	Morris et al., 2019	29.9218	-115.311							0.768293	59.3152	1.07483	14.7553	9.67799	0.234496	2.80293	5.71811	5.00758	1.26377	0.149834	42.6678	207.368	4.214		4.214	31.066	161.898	70.4177	64.8	3.23586	0.427938	299.032	12.2082	30.7623	4.92234	23.6136	8.12904	1.65358	10.0563	1.9308	12.8392	2.71987	7.7195	1.15623
66A	SVBB	Ku	undifferentiated	undifferentiated		Morris et al., 2019	29.9122	-115.311							0.309119	62.7858	1.03458	15.5747	3.93331	0.126755	1.97794	7.69712	6.22858	0.463799	0.177451	23.5208	145.432	1.372		5.978	7.154	263.028	47.9473	159.9	3.80683	0.0529022	164.538	9.13333	24.0226	3.64185	17.6487	5.75133	1.29649	7.1286	1.31354	8.69338	1.82103	5.21692	0.769426
66B	SVBB	Ku	undifferentiated	undifferentiated		Morris et al., 2019	29.9122	-115.311							0.60315	57.3712	0.90195	19.0002	5.47881	0.160328	2.44184	7.81555	5.98712	0.7009	0.142102	23.7974	184.797	10.9045		10.5185	9.3605	512.479	30.9125	101.2	2.42779	0.15308	200.298	6.12443	15.0814	2.32545	11.5956	3.77991	0.861329	4.59289	0.843999	5.50132	1.17471	3.34474	0.503782
66C	SVBB	Kpsf-f	plutonic rock	plutonic rock		Morris et al., 2019	29.9122	-115.311							0.397614	67.1623	0.752309	14.6461	3.68757	0.108046	1.48188	6.98203	4.39144	0.632634	0.15571	17.8045	87.468	6.698		3.349	9.85	234.965	36.0931	196.3	3.10722	0.205988	212.171	7.74002	18.2917	2.64857	12.7097	4.1021	1.58528	5.10805	0.939774	6.06284	1.31862	3.83377	0.57102
66D1	SVBB	Kpsf-f	plutonic rock	cumulate		Morris et al., 2019	29.9122	-115.311							0.8068	70.4683	0.513171	13.3518	3.43438	0.0786762	0.847229	2.94056	3.65189	4.62043	0.0935045	10.4605	54.0765	5.516		1.576	63.434	140.944	19.673	189.3	2.67711	0.207588	1661.71	3.30934	8.01438	1.27682	6.41748	2.16192	0.985845	2.7277	0.496256	3.18507	0.720599	2.11745	0.332387
66D2	SVBB	Kpsf-f	plutonic rock	plutonic rock		Morris et al., 2019	29.9122	-115.311	0.512839	6.68876	0.705104	18.3011	15.5603	38.1177	1.32152	63.7539	0.870324	14.5892	6.29671	0.128681	2.0996	5.41881	4.77618	1.89359	0.173008	19.1903	103.326	7.88		4.6295	28.762	174.285	55.6172	178.1	3.66751	0.450191	637.851	6.25006	16.4737	2.7542	14.5267	5.39759	1.83692	7.31044	1.402	9.44357	2.02055	5.89689	0.886696
67B	SVBB	Ku	undifferentiated	undifferentiated	x	Morris et al., 2019	29.9135	-115.311	0.512831	6.52118	0.703827	18.4569	15.5643	38.1846	1.86827	53.1434	0.864879	18.2494	8.62838	0.197466	5.90943	9.36875	3.0492	0.476909	0.112215	34.3406	221.921	83.725		33.7855	18.4195	217.256	17.8611	54.8	1.20395	0.833622	61.945	1.09193	3.06985	0.592428	3.44297	1.64203	0.739825	2.45419	0.476777	3.13901	0.686697	1.99918	0.295975
68A	SVBB	Kpsf-f	plutonic rock	plutonic rock	x	Morris et al., 2019	29.917	-115.309							1.63199	70.7996	0.688053	14.3128	3.56847	0.11066	1.4662	3.96271	4.53695	0.437133	0.117499	19.9025	48.856	5.516		0.394	10.835	202.806	43.6386	172.6	3.00018	0.256242	193.092	7.59262	25.1768	4.57777	24.5799	7.62367	1.93033	8.45793	1.37776	8.47447	1.76474	4.89151	0.715421
68B	SVBB	Kpsf-m	plutonic rock	cumulate	x	Morris et al., 2019	29.917	-115.309							1.54055	53.3281	1.17333	18.0664	9.61744	0.255955	4.18514	9.4062	3.45904	0.373675	0.134698	33.1189	275.111	40.6805		8.471	10.441	226.477	37.6355	60.5	1.68716	0.883603	133.428	3.06493	9.74748	1.78845	9.82629	3.74999	0.990197	4.76526	0.915849	6.43242	1.37468	3.94713	0.617351
70C	SVBB	Ku	undifferentiated	undifferentiated		Morris et al., 2019	29.9172	-115.31	0.512847	6.83228	0.703791	18.4746	15.564	38.1905	0.694444	59.7193	1.14329	15.7398	8.66548	0.216471	2.79644	6.72366	4.2847	0.513988	0.196949	31.0891	192.765	7.88		4.4325	11.82	202.251	28.4438	101.1	2.01299	0.480145	245.289	5.33676	13.7971	2.16726	10.8545	3.35874	1.29144	4.34514	0.768319	5.14217	1.09812	3.09678	0.465326
85B	NFBB	Kh-m	hypabyssal intrusion	hypabyssal intrusion		Medynski	30.1862	-115.479								51.9682	0.973064	17.76	11.083	0.251561	5.04578	8.63372	3.37091	0.824659	0.0890669	41.1625	373.032	9.801		14.256	13.7103	225.522	30.5433	72.9188	1.91268	1.15857	118.503	5.55096	13.762	2.12589	10.7713	3.56749	1.28257	4.70207	0.86264	5.773	1.21842	3.45315	0.501863
96A	NFBB	Kplm-i	plutonic rock	plutonic rock		Medynski	30.1882	-115.457								60.0457	1.44212	13.8088	10.5807	0.164312	2.2831	6.56262	2.9319	2.02305	0.157662	30.3644					9.9736	225.851	27.6759	82.1024	2.56987	0.232202	115.01	8.87728	19.757	2.69384	12.286	3.50232	1.20616	4.27104	0.764671	5.07999	1.0777	2.96506	0.446504
96B	NFBB	Kplm-f	plutonic rock	plutonic rock		Medynski	30.1882	-115.457								75.3925	0.226705	12.6395	2.22254	0.0493561	0.348104	1.38827	3.19135	4.50916	0.0325175	20.5954	76.8427	21.6284	3.4349	4.73889	3.33649	228.524	54.4162	163.646	5.28465	0.154617	76.6872	13.8411	33.4405	4.8799	22.8544	6.80661	1.72668	8.23403	1.49151	9.77373	2.11374	5.96128	0.900345
[truncated: 10 more columns]

## Sheet: Info
This Supplemental Material accompanies
Geological Society of America Special Paper 560
Geology of a Large Intact Extensional Oceanic Arc Crustal Section with
Superior Exposures: Cretaceous Alisitos Arc, Baja California (Mexico)
By Cathy J. Busby, Rebecca A. Morris, Susan M. DeBari, Sarah Medynski,
Keith Purtirka, Graham D.M. Andrews, Axel K. Schmitt, and Sarah R. Brown
