# Supplementary material
Source: publisher figshare collection journal article supplement (https://gsapubs.figshare.com/articles/dataset/_/21714257)

**Mapping by S. Medynski, R.A. Morris, C.J. Busby and S.M. DeBari (2014-2018), and  
B. Fackler-Adams and C.J. Busby (1993-1996)**

Location shown on text Figure 2.

This plate is also available as Supplemental Material at  
<https://doi.org/10.1130/SPE.S.21714257>.  
 © 2023 The Geological Society of America  
 Printed in the USA

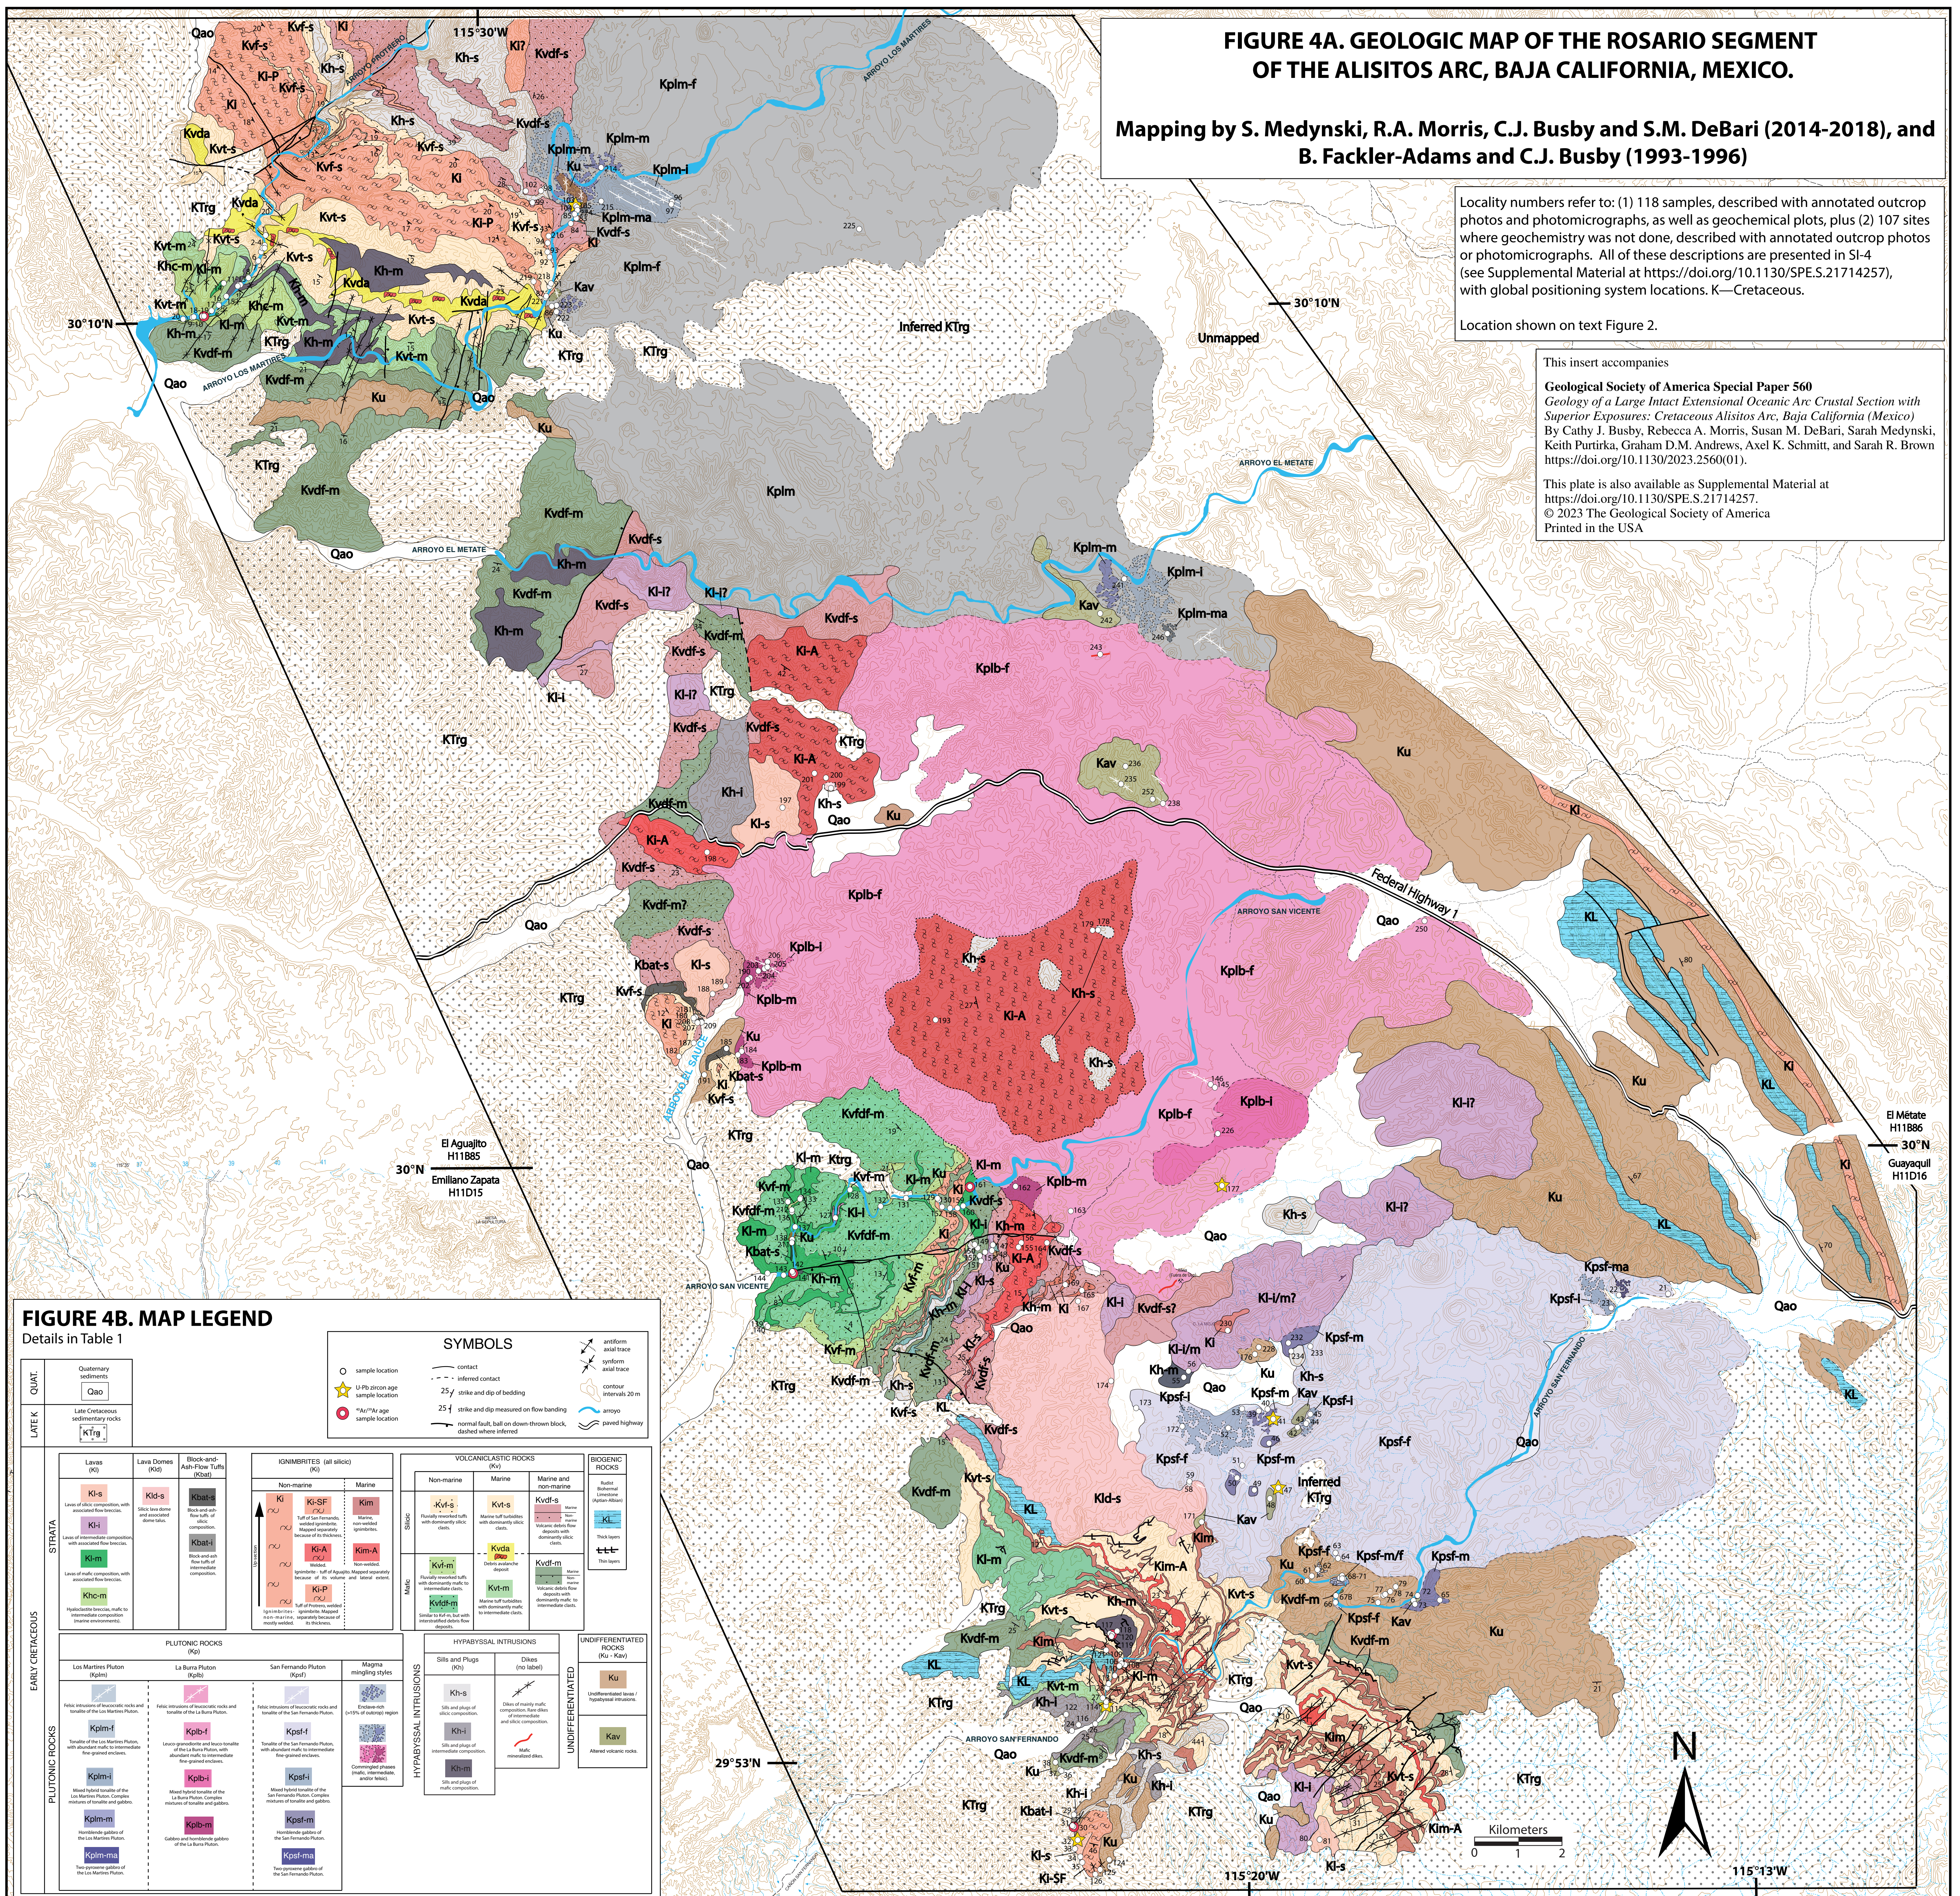

Supplement: Supplementary file 2 [file 1]
